---

## Erratum

---

European Heart Journal (1999) 20, 755–763

# Circulating N-terminal pro-atrial natriuretic peptide is an independent predictor of left ventricular hypertrophy in the general population

## The Tromsø Study

H. Schirmer and T. Omland

The correct version of Table 3 for the above article is given below.

**Table 3** Number of subjects with left ventricular hypertrophy and left ventricular ejection fraction  $\leq 45\%$  for increasing levels of N-ANP

| N-ANP level (pmol.l <sup>-1</sup> ) | 0–713      | 714–1291   | >1291     | Total      | CMH test for general association |
|-------------------------------------|------------|------------|-----------|------------|----------------------------------|
| LVEF >45% and no LVH                | 184 (95.3) | 138 (83.1) | 14 (46.7) | 336 (86.4) |                                  |
| LVEF >45% and LVH                   | 9 (4.7)    | 26 (15.7)  | 6 (20.0)  | 41 (10.5)  |                                  |
| LVEF $\leq 45\%$ and no LVH         | 0          | 1 (0.6)    | 1 (3.3)   | 2 (0.5)    |                                  |
| LVEF $\leq 45\%$ and LVH            | 0          | 1 (0.6)    | 9 (30.0)  | 10 (2.6)   |                                  |
| Total                               | 193 (100)  | 166 (100)  | 30 (100)  | 389 (100)  | $P < 0.001$                      |
| % of total                          | 49.6       | 42.7       | 7.7       |            |                                  |

\*N-ANP=N-terminal pro-atrial natriuretic peptide; CMH=Cochran-Mantel-Haenszel; LVEF=Left ventricular ejection fraction. LVH=Left ventricular hypertrophy. Column percentages in brackets.
